# Supplementary material
Source: Springer Nature journal article supplement (https://www.springermedizin.de/resource/supplementary/12889_2011_3163_MOESM3_ESM.pdf/9488390)

**Figure 1. Flow diagram of the FUMEPOC study**

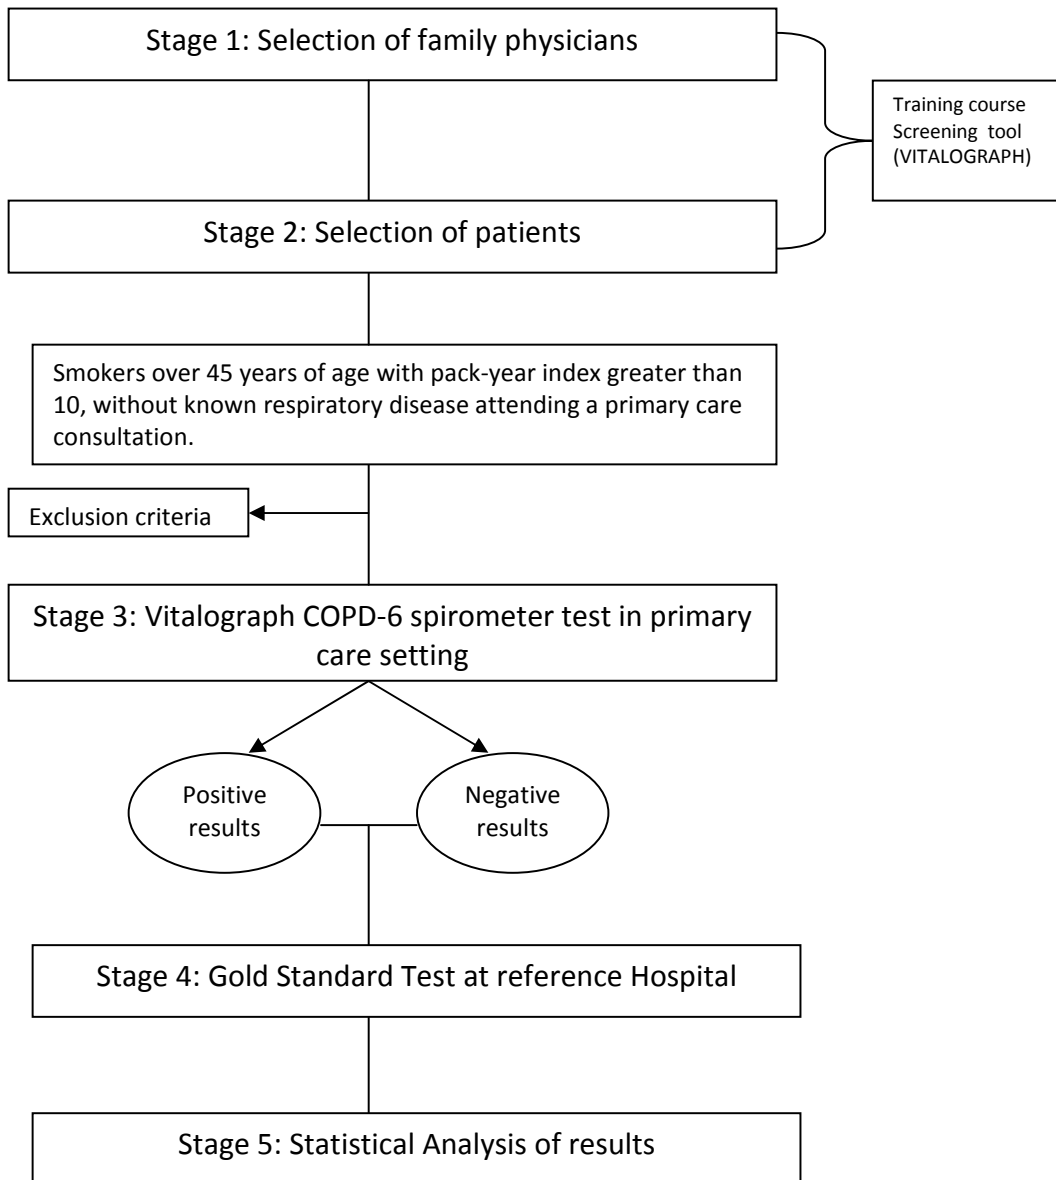

Supplement: MOESM3 [file 9488390]
